# Supplementary material for: Hemoglobin Concentration and Pregnancy Outcomes: A Systematic Review and Meta-Analysis
Source: Hindawi journal article supplement (doi:10.1155/2013/769057), 2013-01-01
Supplement: f1 [file 769057.f1.pdf]

# Appendix S1 : Search strategies for Medline and Scopus

**P** 1. pregnancy

2. pregnant women

3. 1 or 2

**I** 4. hemoglobin

5. haemoglobin

6. anemia

7. anaemia

8. hematologic parameter

9. haematologic parameter

10. 4 or 5 or 6 or 7 or 8 or 9

11. 3 AND 10

**O** 12. mortality

13. preterm birth

14. preterm delivery

15. low birth weight

16. small for gestational age

17. 12 or 13 or 14 or 15 or 16

18 11 AND 17

Table S1. Risk of bias assessments for individual included studies

| <b>Author(year)</b>         | <b>Representative<br/>of<br/>studied<br/>subjects</b> | <b>Ascertainment<br/>of<br/>outcom<br/>es</b> | <b>Ascertainment<br/>of<br/>hemoglo<br/>bin<br/>measure<br/>ment</b> | <b>Confounding<br/>bias</b> |
|-----------------------------|-------------------------------------------------------|-----------------------------------------------|----------------------------------------------------------------------|-----------------------------|
| Abeysena et al., (2010)[17] | No                                                    | Yes                                           | No                                                                   | Yes                         |
| Kumar et al., (2010)[34]    | Yes                                                   | Yes                                           | Yes                                                                  | Yes                         |
| Kidanto et al., (2009)[32]  | Yes                                                   | Yes                                           | Yes                                                                  | Yes                         |
| Zhang et al., (2009)[16]    | Yes                                                   | Yes                                           | Yes                                                                  | Yes                         |
| Zhang et al., (2009)[33]    | Yes                                                   | Yes                                           | Yes                                                                  | No                          |
| Ren et al., (2007)[12]      | Yes                                                   | Yes                                           | Yes                                                                  | Yes                         |
| Lee et al., (2006)[29]      | Yes                                                   | Yes                                           | Yes                                                                  | Yes                         |
| Mamun et al., (2006)[30]    | Yes                                                   | Yes                                           | Yes                                                                  | Yes                         |
| Hosain(2006)[31]            | Yes                                                   | Yes                                           | Yes                                                                  | Yes                         |
| Levy et al., (2005)[11]     | Yes                                                   | Yes                                           | Yes                                                                  | Yes                         |

|                                   |     |     |     |     |
|-----------------------------------|-----|-----|-----|-----|
| Little et al., (2005)[15]         | Yes | Yes | Yes | Yes |
| Ronnenberg et al., (2004)[10]     | Yes | Yes | Yes | No  |
| Chang et al., (2003)[26]          | Yes | Yes | No  | Yes |
| Hamalainen et al., (2003)[27]     | Yes | Yes | No  | Yes |
| Xiong et al., (2003)[28]          | Yes | Yes | No  | Yes |
| Marti(2001)[25]                   | Yes | Yes | Yes | No  |
| Zhou et al., (1998)[9]            | Yes | Yes | No  | Yes |
| Onadenko(1996)[24]                | Yes | Yes | Yes | Yes |
| Rasmussen and Oian,<br>(1993)[18] | Yes | Yes | Yes | Yes |
| Knottnerus et al., (1990)[7]      | Yes | Yes | No  | Yes |

Each item is asked whether there is low risk of bias? Yes=low risk, No = high risk

Table S2. Frequency data about hemoglobin concentration and preterm birth

| Trimester | Author, Year<br>[reference no.] | Hb<br>cutoff(g/dl) | event | no-event | OR<br>(95% CI)  | Adjusted OR<br>(95% CI) |
|-----------|---------------------------------|--------------------|-------|----------|-----------------|-------------------------|
| 1         | Abeysena et al.,<br>2010[17]    | < 10.4             | 2     | 18       | 0.84(0.19-3.67) | 0.64(0.08-5.15)         |
|           |                                 | 10.4-13.9          | 75    | 564      | 1.0             | 1.0                     |
|           |                                 | (reference)        |       |          |                 |                         |
|           | Kumar et al.,<br>2010[34]       | > 13.9             | 3     | 32       | 0.70(0.21-2.36) | 0.37(0.05-2.80)         |
|           |                                 | < 7                | 6     | 8        | 2.47(0.70-8.16) | NA                      |
|           |                                 | ≥ 7                | 484   | 1,549    | 1.0             | NA                      |
|           | Kidanto et al.,<br>2009[32]     | (reference)        |       |          |                 |                         |
|           |                                 | < 7                | 37    | 63       | 4.1(2.5-6.6)    | NA                      |
|           |                                 | 7.0-8.9            | 67    | 336      | 1.4(0.96-2.0)   | NA                      |
|           | Zhang et al.,<br>2009[16]       | 9.0-10.9           | 112   | 559      | 1.4(1.01-1.9)   | NA                      |
|           |                                 | ≥ 11               | 68    | 479      | 1.0             | NA                      |
|           |                                 | (reference)        |       |          |                 |                         |

|   |                                 |             |        |         |                  |                 |
|---|---------------------------------|-------------|--------|---------|------------------|-----------------|
|   | Ren et al., 2007[12]            | < 8.0       | 10     | 100     | 2.17(1.00-4.17)  | 1.86(0.90-3.84) |
|   |                                 | 8.0-9.9     | 218    | 3,610   | 1.31(1.13-1.52)  | 1.34(1.16-1.55) |
|   |                                 | 10.0-11.9   | 1,937  | 42,091  | 1.0              | 1.0             |
|   |                                 | (reference) |        |         |                  |                 |
|   |                                 | 12.0-13.9   | 1,570  | 34,117  | 1.00(0.93-1.07)  | 0.98(0.91-1.04) |
|   |                                 | 14.0-15.9   | 176    | 4,123   | 0.93(0.79-1.09)  | 0.91(0.77-1.06) |
|   |                                 | ≥ 16        | 6      | 193     | 0.68(0.24-1.50)  | 0.42(0.14-1.33) |
|   | Levy et al., 2005[11]           | < 10        | 1,411  | 11,793  | 1.20(1.13-1.27)  | 1.2(1.1-1.2)    |
|   |                                 | ≥ 10        | 12,683 | 127,509 | 1.0              | 1.0             |
|   |                                 | (reference) |        |         |                  |                 |
|   | Ronneberg et al.,<br>2004[10]   | < 9.5       | 6      | 34      | 2.09(0.54-7.83)  | 2.9(0.8-11.3)   |
|   |                                 | 9.5-11.9    | 14     | 261     | 0.63(0.23-1.93)  | 0.7(0.3-1.9)    |
|   |                                 | ≥ 12        | 7      | 83      | 1.0              | 1.0             |
|   |                                 | (reference) |        |         |                  |                 |
|   | Hamalainen et al.,<br>2003[27]  | < 10        | 5      | 64      | 1.80(0.57-4.45)  | 1.80(0.72-4.49) |
|   |                                 | ≥ 10        | 920    | 21,282  | 1.0              | 1.0             |
|   |                                 | (reference) |        |         |                  |                 |
|   | Xiong et al., 2003[28]          | < 10        | 59     | 1,428   | 1.07(0.81-1.41)  | 1.01(0.75-1.37) |
|   |                                 | ≥ 10        | 482    | 12,541  | 1.0              | 1.0             |
|   |                                 | (reference) |        |         |                  |                 |
|   | Zhou et al., 1998[9]            | < 9.0       | 5      | 27      | 3.73(1.36-10.23) | NA              |
|   |                                 | 9.0-9.9     | 12     | 97      | 2.63(1.17-5.90)  | NA              |
|   |                                 | 10.0-10.9   | 18     | 245     | 1.64(0.77-3.47)  | NA              |
|   |                                 | 11.0-11.9   | 10     | 229     | 1.0              | NA              |
|   |                                 | (reference) |        |         |                  |                 |
|   |                                 | 12.0-12.9   | 6      | 123     | 1.11(0.41-2.99)  | NA              |
|   | Rasmussen and Oian,<br>1993[18] | < 11        | 8      | 99      | 1.26(0.52-2.64)  | NA              |
|   |                                 | 11-14       | 158    | 2,464   | 1.0              | NA              |
|   |                                 | (reference) |        |         |                  |                 |
|   |                                 | ≥ 14        | 33     | 312     | 1.65(1.08-2.46)  | NA              |
| 2 | Zhang et al., 2009[16]          | < 10        | 772    | 18,783  | 0.95(0.87-1.02)  | NA              |
|   |                                 | ≥ 10        | 3,253  | 74,804  | 1.0              | NA              |
|   |                                 | (reference) |        |         |                  |                 |
|   | Chang et al., 2003[26]          | ≤ 10.5      | 5      | 59      | 0.98(0.26-3.09)  | 0.98(0.37-2.64) |
|   |                                 | 10.6-12.0   | 13     | 150     | 1.0              | 1.0             |

|                                |                        |             |       |        |                  |                 |
|--------------------------------|------------------------|-------------|-------|--------|------------------|-----------------|
|                                |                        | (reference) |       |        |                  |                 |
|                                |                        | > 12.0      | 11    | 52     | 2.44(0.92-6.29)  | 2.19(1.04-4.61) |
| Hamalainen et al.,<br>2003[27] |                        | < 10        | 11    | 261    | 0.97(0.48-1.78)  | 0.97(0.53-1.48) |
|                                |                        | ≥ 10        | 920   | 21,282 | 1.0              | 1.0             |
|                                |                        | (reference) |       |        |                  |                 |
| 3                              | Zhang et al., 2009[16] | < 10        | 871   | 23,716 | 0.81(0.75-0.88)  | NA              |
|                                |                        | ≥ 10        | 3,154 | 69,871 | 1.0              | NA              |
|                                |                        | (reference) |       |        |                  |                 |
| Lee et al., 2006[29]           |                        | < 10.8      | 11    | 44     | 2.93(0.79-13.47) | NA              |
|                                |                        | 10.8-11.9   | 4     | 47     | 1.0              | NA              |
|                                |                        | (reference) |       |        |                  |                 |
|                                |                        | ≥ 12        | 3     | 60     | 0.59(0.08-3.67)  | NA              |
| Chang et al., 2003[26]         |                        | ≤ 10.5      | 24    | 266    | 0.73(0.41-1.26)  | 0.76(0.48-1.21) |
|                                |                        | 10.6-12.0   | 44    | 356    | 1.0              | 1.0             |
|                                |                        | (reference) |       |        |                  |                 |
|                                |                        | > 12.0      | 12    | 67     | 1.45(0.66-2.97)  | 1.43(0.80-2.57) |
| Hamalainen et al.,<br>2003[27] |                        | < 10        | 14    | 242    | 1.33(0.72-2.30)  | 1.53(0.88-2.64) |
|                                |                        | ≥ 10        | 920   | 21,282 | 1.0              | 1.0             |
|                                |                        | (reference) |       |        |                  |                 |
| Xiong et al., 2003[28]         |                        | < 10        | 81    | 2,920  | 0.65(0.51-0.82)  | 0.72(0.56-0.92) |
|                                |                        | ≥ 10        | 531   | 12,541 | 1.0              | 1.0             |
|                                |                        | (reference) |       |        |                  |                 |
| Marti et al., 2001[25]         |                        | 5-8         | 13    | 7      | 3.71(1.27-11.66) | 3.92(1.58-9.72) |
|                                |                        | 9-9.99      | 16    | 10     | 3.20(1.25-8.47)  | 3.41(1.54-7.54) |
|                                |                        | 10-10.99    | 25    | 34     | 1.47(0.75-2.86)  | 1.54(0.89-2.66) |
|                                |                        | 11-11.99    | 42    | 77     | 1.09(0.63-1.88)  | 1.11(0.73-1.71) |
|                                |                        | 12-12.99    | 48    | 96     | 1.0              | 1.0             |
|                                |                        | (reference) |       |        |                  |                 |
|                                |                        | 13-13.99    | 25    | 87     | 0.57(0.31-1.04)  | 0.50(0.31-0.82) |
|                                |                        | > 14        | 12    | 51     | 0.47(0.21-1.00)  | 0.43(0.22-0.82) |
| Knottnerus et al.,<br>1990[7]  |                        | ≤ 6.9       | 8     | 201    | 0.40(0.13-1.22)  | NA              |
|                                |                        | 7.0-7.9     | 17    | 470    | 0.37(0.15-0.96)  | NA              |
|                                |                        | ≥ 8.0       | 9     | 91     | 1.0              | NA              |
|                                |                        | (reference) |       |        |                  |                 |

Table S3. Frequency data for hemoglobin groups and low birth weight

| Trimester | Author, Year                 | Hb           | event | no-event | OR              | Adjusted OR     |
|-----------|------------------------------|--------------|-------|----------|-----------------|-----------------|
|           | [reference no.]              | cutoff(g/dl) |       |          | (95% CI)        | (95% CI)        |
| 1         | Abeysena et al.,<br>2010[17] | < 10.4       | 3     | 17       | 1.43(0.26-5.14) | 1.43(0.41-5.00) |
|           |                              | 10.4-13.9    | 70    | 569      | 1.0             | 1.0             |
|           |                              | (reference)  |       |          |                 |                 |
|           | Kumar et al.,<br>2010[34]    | > 13.9       | 9     | 26       | 2.81(1.11-6.49) | 2.81(1.27-6.25) |
|           |                              | < 10         | 217   | 644      | 1.02(0.83-1.25) | NA              |
|           |                              | ≥ 10         | 289   | 877      | 1.0             | NA              |
|           | Kidanto et al.,<br>2009[32]  | (reference)  |       |          |                 |                 |
|           |                              | < 7          | 30    | 70       | 3.8(2.3-6.3)    | NA              |
|           |                              | 7.0-8.9      | 72    | 331      | 1.7(1.2-2.6)    | NA              |
|           | Ren et al., 2007[12]         | 9.0-10.9     | 86    | 585      | 1.2(0.85-1.7)   | NA              |
|           |                              | ≥ 11         | 59    | 488      | 1.0             | NA              |
|           |                              | (reference)  |       |          |                 |                 |
|           | Hosain et al.,<br>2006[31]   | < 8.0        | 5     | 105      | 2.60(0.82-6.28) | 2.16(0.79-5.89) |
|           |                              | 8.0-9.9      | 103   | 3,725    | 1.51(1.21-1.86) | 1.44(1.17-1.78) |
|           |                              | 10.0-11.9    | 793   | 43,235   | 1.0             | 1.0             |
|           |                              | (reference)  |       |          |                 |                 |
|           |                              | 12.0-13.9    | 678   | 35,009   | 1.06(0.95-1.17) | 1.08(0.97-1.20) |
|           |                              | 14.0-15.9    | 64    | 4,235    | 0.82(0.63-1.07) | 0.90(0.70-1.17) |
|           |                              | ≥ 16         | 2     | 195      | 0.56(0.07-2.05) | 0.78(0.19-3.15) |

|   |                                |             |        |         |                  |                 |
|---|--------------------------------|-------------|--------|---------|------------------|-----------------|
|   |                                | (reference) |        |         |                  |                 |
|   | Levy et al, 2005[11]           | < 10        | 1,386  | 11,818  | 1.13(1.07-1.20)  | 1.1(1.1-1.2)    |
|   |                                | ≥ 10        | 13,172 | 127,020 | 1.0              | 1.0             |
|   |                                | (reference) |        |         |                  |                 |
|   | Ronnenberg et al,<br>2004[10]  | < 9.5       | 7      | 33      | 3.61(0.90-15.32) | 6.5(1.6-26.7)   |
|   |                                | 9.5-11.9    | 21     | 254     | 1.41(0.49-4.92)  | 2.0(0.7-5.9)    |
|   |                                | ≥ 12        | 5      | 85      | 1.0              | 1.0             |
|   |                                | (reference) |        |         |                  |                 |
|   | Hamalainen et al.,<br>2003[27] | < 10        | 6      | 63      | 3.19(1.13-7.38)  | 3.14(1.35-7.28) |
|   |                                | ≥ 10        | 643    | 21,559  | 1.0              | 1.0             |
|   |                                | (reference) |        |         |                  |                 |
|   | Xiong et al., 2003[28]         | < 10        | 39     | 1,448   | 0.83(0.59-1.16)  | 0.75(0.53-1.07) |
|   |                                | ≥ 10        | 404    | 12,619  | 1.0              | 1.0             |
|   |                                | (reference) |        |         |                  |                 |
|   | Zhou et al., 1998[9]           | < 9.0       | 2      | 30      | 2.99(0.60-14.76) | NA              |
|   |                                | 9.0-9.9     | 8      | 101     | 3.27(1.09-9.77)  | NA              |
|   |                                | 10.0-10.9   | 15     | 248     | 2.73(1.01-7.39)  | NA              |
|   |                                | 11.0-11.9   | 5      | 234     | 1.0              | NA              |
|   |                                | (reference) |        |         |                  |                 |
|   |                                | 12.0-12.9   | 5      | 124     | 1.85(0.55-6.28)  | NA              |
|   |                                | ≥ 13.0      | 3      | 54      | 2.52(0.62-6.28)  | NA              |
| 2 | Chang et al., 2003[26]         | ≤ 10.5      | 6      | 58      | 1.57(0.45-5.02)  | 1.52(0.58-4.03) |
|   |                                | 10.6-12.0   | 10     | 152     | 1.0              | 1.0             |
|   |                                | (reference) |        |         |                  |                 |
|   |                                | > 12.0      | 12     | 51      | 3.58(1.32-9.79)  | 3.09(1.40-6.82) |
|   | Hamalainen et al.,<br>2003[27] | < 10        | 5      | 267     | 0.63(0.20-1.49)  | 0.61(0.25-1.48) |
|   |                                | ≥ 10        | 643    | 21,559  | 1.0              | 1.0             |
| 3 |                                | (reference) |        |         |                  |                 |
|   | Lee et al., 2006[29]           | < 10.8      | 11     | 43      | 3.01(0.80-13.79) | NA              |
|   |                                | 10.8-11.9   | 4      | 47      | 1.0              | NA              |
|   |                                | (reference) |        |         |                  |                 |
|   |                                | ≥ 12        | 3      | 61      | 0.58(0.08-3.61)  | NA              |
|   | Chang et al., 2003[26]         | ≤ 10.5      | 21     | 268     | 0.68(0.37-1.22)  | 0.69(0.42-1.14) |
|   |                                | 10.6-12.0   | 41     | 358     | 1.0              | 1.0             |
|   |                                | (reference) |        |         |                  |                 |

|                                |             |     |        |                 |                 |
|--------------------------------|-------------|-----|--------|-----------------|-----------------|
|                                | > 12.0      | 15  | 63     | 2.08(1.01-4.11) | 1.88(1.11-3.19) |
| Hamalainen et al.,<br>2003[27] | < 10        | 8   | 248    | 1.08(0.46-2.18) | 1.28(0.63-2.62) |
|                                | $\geq 10$   | 643 | 21,559 | 1.0             | 1.0             |
|                                | (reference) |     |        |                 |                 |
| Xiong et al., 2003[28]         | < 10        | 81  | 2,920  | 0.86(0.67-1.09) | 0.90(0.71-1.61) |
|                                | $\geq 10$   | 401 | 12,541 | 1.0             | 1.0             |
|                                | (reference) |     |        |                 |                 |
| Onadenko et al.,<br>1996[24]   | < 10        | 16  | 28     | 4.39(2.18-8.52) | NA              |
|                                | 10.0-10.9   | 146 | 857    | 1.31(1.04-1.63) | NA              |
|                                | 11.0-11.9   | 260 | 1,997  | 1.0             | NA              |
|                                | (reference) |     |        |                 |                 |
|                                | 12.0-12.9   | 100 | 873    | 0.88(0.68-1.13) | NA              |
|                                | 13.0-13.9   | 18  | 215    | 0.64(0.37-1.06) | NA              |
|                                | 14.0-14.9   | 2   | 27     | 0.57(0.07-2.29) | NA              |
| Knottnerus et al.,<br>1990[7]  | $\leq 6.9$  | 10  | 199    | 0.28(0.11-0.71) | NA              |
|                                | 7.0-7.9     | 19  | 468    | 0.23(0.11-0.51) | NA              |
|                                | $\geq 8.0$  | 15  | 85     | 1.0             | NA              |
|                                | (reference) |     |        |                 |                 |

---

Table S4. Frequency data for hemoglobin groups and small for gestational age

| Trimester | Author, Year<br>[reference no.] | Hb<br>cutoff(g/dl) | event | no-event | OR<br>(95% CI)  | Adjusted OR<br>(95% CI) |
|-----------|---------------------------------|--------------------|-------|----------|-----------------|-------------------------|
| 1         | Abeysena et al.,<br>2010[17]    | < 10.4             | 2     | 13       | 0.82(0.09-3.70) | 0.81(0.18-3.67)         |
|           |                                 | 10.4-13.9          | 96    | 509      | 1.0             | 1.0                     |
|           |                                 | (reference)        |       |          |                 |                         |
|           | Ren et al., 2007[12]            | > 13.9             | 7     | 24       | 1.55(0.55-3.83) | 1.55(0.65-3.70)         |
|           |                                 | < 8.0              | 8     | 103      | 1.58(0.66-3.23) | 1.49(0.69-3.23)         |
|           |                                 | 8.0-9.9            | 211   | 3,617    | 1.35(1.16-1.57) | 1.13(0.98-1.31)         |
|           |                                 | 10.0-11.9          | 2,069 | 41,959   | 1.0             | 1.0                     |
|           |                                 | (reference)        |       |          |                 |                         |
|           |                                 | 12.0-13.9          | 1,535 | 34,152   | 0.91(0.85-9.76) | 0.98(0.91-1.05)         |
|           |                                 | 14.0-15.9          | 181   | 4,118    | 0.89(0.76-1.04) | 0.99(0.84-1.16)         |
|           |                                 | ≥ 16               | 6     | 191      | 0.64(0.23-1.41) | 0.61(0.22-1.65)         |
|           | Xiong et al., 2003[28]          | < 10               | 80    | 1,407    | 0.81(0.64-1.02) | 0.78(0.61-1.01)         |
|           |                                 | ≥ 10               | 860   | 12,163   | 1.0             | 1.0                     |
|           |                                 | (reference)        |       |          |                 |                         |
|           | Hamalainen et al.,<br>2003[27]  | < 10               | 6     | 63       | 0.94(0.33-2.16) | 0.94(0.41-2.17)         |
|           |                                 | ≥ 10               | 2,051 | 20,151   | 1.0             | 1.0                     |
|           |                                 | (reference)        |       |          |                 |                         |
|           | Zhou et al., 1998[9]            | < 9.0              | 3     | 29       | 0.80(0.26-2.48) | NA                      |
|           |                                 | 9.0-9.9            | 13    | 96       | 1.02(0.55-1.89) | NA                      |
|           |                                 | 10.0-10.9          | 31    | 232      | 1.01(0.62-1.63) | NA                      |
|           |                                 | 11.0-11.9          | 28    | 211      | 1.0             | NA                      |
|           |                                 | (reference)        |       |          |                 |                         |
|           |                                 | 12.0-12.9          | 15    | 114      | 0.99(0.55-1.79) | NA                      |
|           |                                 | ≥ 13.0             | 5     | 52       | 0.75(0.30-1.85) | NA                      |
|           | Rasmussen and Oian,<br>1993[18] | < 11               | 5     | 102      | 2.81(0.85-7.26) | NA                      |
|           |                                 | 11-14              | 45    | 2,577    | 1.0             | NA                      |
|           |                                 | (reference)        |       |          |                 |                         |
|           |                                 | ≥ 14               | 10    | 335      | 1.61(0.72-3.28) | NA                      |
| 2         | Hamalainen et al.,              | < 10               | 21    | 251      | 0.82(0.50-1.29) | 0.80(0.51-1.25)         |



|       |                                 |             |             |       |                 |                 |                 |
|-------|---------------------------------|-------------|-------------|-------|-----------------|-----------------|-----------------|
|       |                                 | 2003[27]    | $\geq 10$   | 2,051 | 20,151          | 1.0             | 1.0             |
|       |                                 |             | (reference) |       |                 |                 |                 |
| 3     | Rasmussen and Oian,<br>1993[18] |             | < 10.0      | 4     | 219             | 0.95(0.25-2.63) | NA              |
|       |                                 |             | 10.0-13.0   | 47    | 2,441           | 1.0             | NA              |
|       |                                 | (reference) |             |       |                 |                 |                 |
|       |                                 | $\geq 13.0$ | 9           | 154   | 3.04(1.28-6.41) | NA              |                 |
| <hr/> |                                 |             |             |       |                 |                 |                 |
| 3     | Hamalainen et al.,<br>2003[27]  |             | < 10        | 18    | 238             | 0.74(0.43-1.20) | 0.75(0.46-1.21) |
|       |                                 |             | $\geq 10$   | 2,051 | 20,151          | 1.0             | 1.0             |
|       |                                 | (reference) |             |       |                 |                 |                 |
|       | Xiong et al., 2003[28]          |             | < 10        | 183   | 2,818           | 0.93(0.79-1.10) | 0.93(0.79-1.10) |
|       |                                 |             | $\geq 10$   | 841   | 12,101          | 1.0             | 1.0             |
|       |                                 |             | (reference) |       |                 |                 |                 |
